# Supplementary material for: Gene Regulatory Network Analysis Identifies Sex-Linked Differences in Colon Cancer Drug Metabolism
Source: Oxford University Press journal article supplement (doi:10.1158/0008-5472.can-18-0454), 2018-10-01
Supplement: 00085472can180454-sup-196949_2_supp_4867144_pb94sx.xlsx [file 00085472can180454-sup-196949_2_supp_4867144_pb94sx.xlsx]

## Sheet: table S2
Pathways differentially targeted between male and female colon cancer regulatory networks in the discovery and validation datasets.
Enrichment in males
Pathway	Discovery dataset		Validation dataset
	NES	FDR	NES	FDR
jak stat signaling pathway	-1.9228	0.00385742	-1.17043	0.523087
notch signaling pathway	-2.11416	0.00165134	1.05975	0.614875
chronic myeloid leukemia	-2.15719	0.0010126	-1.00188	0.72032
pancreatic cancer	-2.01186	0.00252278	-1.00709	0.730685
focal adhesion	-2.01837	0.00255833	-1.00767	0.742829
chemokine signaling pathway	-1.84855	0.0068077	0.96077	0.779923
prostate cancer	-1.96166	0.00292764	-0.925566	0.837337
arrhythmogenic right ventricular cardiomyopathy arvc	-1.91679	0.00408979	-0.917545	0.845772
endometrial cancer	-2.22974	0	-0.888648	0.883171
phosphatidylinositol signaling system	-2.06219	0.0022664	0.865233	0.902201
fc gamma r mediated phagocytosis	-1.88621	0.00462787	0.816316	0.92796
colorectal cancer	-2.02608	0.00262517	-0.841691	0.93068
erbb signaling pathway	-2.00585	0.00246433	0.804261	0.934883
adherens junction	-1.91385	0.00386386	-0.813198	0.938931
acute myeloid leukemia	-2.20699	0	0.693066	0.998951
Enrichment in females
Pathway	Discovery dataset		Validation dataset
	NES	FDR	NES	FDR
metabolism of xenobiotics by cytochrome p450	1.79052	0.0150218	1.96727	0.00570496
drug metabolism cytochrome p450	1.64773	0.0414771	1.94036	0.00667493
proteasome	1.96761	0.00361257	-1.65306	0.0919509
tyrosine metabolism	1.59	0.0644353	1.57752	0.126657
steroid hormone biosynthesis	1.76051	0.0184421	1.42279	0.208699
terpenoid backbone biosynthesis	1.80718	0.0145547	1.30825	0.244326
huntingtons disease	1.87198	0.00848508	-1.3562	0.275381
alzheimers disease	1.95653	0.00325518	-1.37584	0.280945
ribosome	2.28742	0.000285185	-1.39854	0.286611
protein export	1.73405	0.0208718	-1.33128	0.293844
oxidative phosphorylation	2.63667	0	-1.20673	0.468379
peroxisome	1.91373	0.00615034	1.13855	0.502561
parkinsons disease	2.48472	0	-1.12541	0.526077
histidine metabolism	1.73551	0.0224357	0.969548	0.771902
amyotrophic lateral sclerosis als	1.67744	0.0344111	-0.851711	0.920483
NES: Normalized enrichment score, FDR: False discovery rate
